# Supplementary material
Source: MDPI journal article supplement (https://www.mdpi.com/2075-163X/13/12/1516)
Supplement: s1 [file s1]

Table S1. Detailed information for studied samples in Jilongshan Cu-Au deposits.

| Ore type        | Sample ID  | Sample name           | gangue mineral assemblages |     |     |    |     |     |     |     |     |     | Ore mineral assemblages |     |     |     |     |     |    |     |     |     |    |     |
|-----------------|------------|-----------------------|----------------------------|-----|-----|----|-----|-----|-----|-----|-----|-----|-------------------------|-----|-----|-----|-----|-----|----|-----|-----|-----|----|-----|
|                 |            |                       | Kfs                        | Pl  | Hbl | Bt | Grt | Px  | Act | Chl | Qz  | Cal | Fl                      | Py1 | Py2 | Py3 | Py4 | Ccp | Bn | Sp  | Gn  | Po  | Mt | Ttr |
| Porphyry type   | JL45       | Granodiorite porphyry | xxx                        | xxx | xx  | x  |     |     |     | xx  | xxx |     | x                       |     | xx  |     |     | x   | x  |     |     |     | x  |     |
|                 | JL109      | Granodiorite porphyry | xx                         | xxx | x   | x  |     |     |     | x   | xx  |     |                         |     | xxx | xx  |     | xxx |    |     |     |     |    |     |
|                 | JL122-1    | Granodiorite porphyry | xxx                        | xx  |     | xx |     |     |     |     | x   |     |                         |     |     | xxx |     | xxx |    |     |     |     |    | x   |
|                 | JL114      | Granodiorite porphyry | x                          | xxx |     | xx |     |     |     |     | xxx |     |                         |     |     | x   |     | xx  |    |     |     |     |    |     |
| Skarn type      | JL64       | Grt skarn             |                            |     |     |    | xxx |     | x   |     |     | x   |                         |     | xxx |     |     | xxx |    |     |     |     | x  |     |
|                 | JL372-8    | Px skarn              |                            |     |     |    | x   | xxx | x   | x   | x   | x   |                         |     |     | x   | x   | x   |    | xxx | xxx | xx  |    |     |
|                 | JL372-13-2 | Px-Grt skarn          |                            |     |     |    | x   | xxx |     |     | x   | x   | x                       |     |     |     | x   | x   |    | xx  | xx  | xxx |    |     |
|                 | JL76       | Grt skarn             |                            |     |     |    | xxx | x   | x   |     | xx  | x   |                         |     | xxx | x   | xx  |     |    | x   |     |     |    | xx  |
|                 | JLS-18     | Grt skarn             |                            |     |     |    | xx  |     | x   | x   | x   |     | x                       | x   | xxx |     |     | x   |    |     |     |     |    |     |
|                 | JLS-24     | Grt skarn             |                            |     |     |    | xxx | x   |     |     | x   | x   |                         | x   | xxx |     |     |     |    |     | xx  |     |    |     |
| Carbonates type | JL104      | Marble                |                            |     |     |    |     |     |     |     | x   | xxx |                         | xxx |     |     | xx  |     |    | xx  | xx  |     |    | xxx |
|                 | JL5        | Marble                |                            |     |     |    |     |     |     | x   | x   | xxx |                         |     |     |     | xxx | xxx |    |     |     |     |    | x   |
|                 | JL39       | Marble                |                            |     |     |    |     |     |     |     | x   | xxx |                         |     |     |     | xxx | x   |    | xxx | xxx |     |    |     |
|                 | JL122-2    | Marble                |                            |     |     |    |     |     |     | x   | x   | xxx |                         |     |     |     | xxx | x   |    |     |     |     |    | xxx |
|                 | JL83       | Marble                |                            |     |     |    |     |     |     | x   | x   | xxx |                         |     |     | xxx |     | xxx |    |     |     |     |    |     |
|                 | JLS3-378   | Marble                |                            |     |     |    |     |     |     |     | x   | xxx |                         |     | xxx |     |     | xxx |    |     |     |     |    |     |

Note: x-trace; xx-minor; xxx-major. Abbreviations: Act-actinolite; Bt-biotite; Bn-bornite; Cal-calcite; Chl-chlorite; Ccp-chalcopyrite; Grt-garnet; Gn-galena; Hbl-hornblende; Kfs-feldspar; Mt-magnetite; Phl-phlogopite; Pl-plagioclase; Po-pyrrhotite; Px-pyroxene; Py-pyrite; Qz-quartz; Sp-sphalerite.

Table S2. EPMA data for Jilongshan pyrite (wt.%).

| Types         | Point#       | Fe    | Fe(apfu) | S     | S(apfu) | Pb    | As   | Te    | Ag    | Ni   | Co   | Au   | Se   | Total  |
|---------------|--------------|-------|----------|-------|---------|-------|------|-------|-------|------|------|------|------|--------|
| Py1<br>(n=19) | JL104-A6-1-1 | 44.96 | 0.80     | 50.79 | 1.59    | 0.26* | 1.59 | <dl   | 0.21* | <dl  | <dl  | <dl  | <dl  | 98.04  |
|               | JL104-A6-1-2 | 44.74 | 0.80     | 50.75 | 1.59    | 0.53* | 1.31 | <dl   | 0.13  | <dl  | <dl  | <dl  | <dl  | 97.70  |
|               | JL104-A6-1-3 | 45.14 | 0.81     | 52.09 | 1.63    | 0.05  | 0.64 | <dl   | 0.05  | <dl  | <dl  | <dl  | <dl  | 98.20  |
|               | JL104-A6-1-4 | 41.26 | 0.74     | 47.26 | 1.48    | 1.99* | 4.94 | 0.26* | 0.64* | 0.02 | <dl  | <dl  | <dl  | 97.11  |
|               | JL104-A6-1-5 | 40.93 | 0.73     | 48.28 | 1.51    | 1.67* | 4.72 | 0.28* | 0.69* | <dl  | 0.02 | <dl  | <dl  | 97.38  |
|               | JL104-A6-1-6 | 45.88 | 0.82     | 51.30 | 1.60    | <dl   | 1.18 | <dl   | 0.03  | <dl  | <dl  | <dl  | <dl  | 98.53  |
|               | JL104-A6-1-7 | 44.79 | 0.80     | 51.32 | 1.60    | 0.21* | 1.03 | <dl   | 0.11  | <dl  | <dl  | <dl  | <dl  | 97.71  |
|               | JL104-A2-1   | 45.67 | 0.82     | 51.57 | 1.61    | <dl   | 0.75 | <dl   | 0.03  | 0.04 | 0.07 | <dl  | <dl  | 100.56 |
|               | JL104-A2-2   | 45.47 | 0.81     | 50.92 | 1.59    | <dl   | 1.13 | <dl   | 0.04  | <dl  | <dl  | <dl  | <dl  | 99.96  |
|               | JL104-A2-3   | 45.35 | 0.81     | 51.39 | 1.61    | <dl   | 1.20 | 0.03  | 0.03  | <dl  | 0.07 | 0.13 | <dl  | 100.60 |
|               | JL104-A2-4   | 44.77 | 0.80     | 51.25 | 1.60    | 0.12  | 1.45 | <dl   | 0.04  | <dl  | 0.06 | 0.09 | <dl  | 100.18 |
|               | JL104-A2-5   | 44.87 | 0.80     | 51.78 | 1.62    | 0.04  | 0.76 | <dl   | <dl   | <dl  | 0.04 | <dl  | <dl  | 99.91  |
|               | JL98-A5-1    | 46.98 | 0.84     | 52.30 | 1.63    | <dl   | 0.06 | <dl   | 0.02  | <dl  | 0.05 | <dl  | 0.03 | 101.90 |
|               | JL98-A5-2    | 46.64 | 0.83     | 52.16 | 1.63    | <dl   | 0.11 | <dl   | <dl   | <dl  | 0.11 | <dl  | <dl  | 101.47 |
|               | JL98-A5-3    | 46.54 | 0.83     | 52.60 | 1.64    | <dl   | 0.26 | <dl   | <dl   | <dl  | 0.09 | <dl  | <dl  | 101.96 |
|               | JL98-A5-4    | 45.87 | 0.82     | 52.43 | 1.64    | <dl   | <dl  | <dl   | <dl   | <dl  | 0.05 | 0.07 | 0.04 | 100.92 |
|               | JL98-A5-5    | 46.00 | 0.82     | 52.14 | 1.63    | <dl   | 0.13 | <dl   | <dl   | <dl  | 0.06 | <dl  | <dl  | 100.78 |
|               | JL98-A5-6    | 45.78 | 0.82     | 52.31 | 1.63    | <dl   | 0.11 | <dl   | <dl   | 0.04 | 0.04 | <dl  | 0.02 | 100.75 |
|               | JL98-A6-1    | 45.91 | 0.82     | 51.08 | 1.60    | 0.02  | 0.08 | <dl   | <dl   | <dl  | <dl  | 0.03 | <dl  | 97.34  |
|               | Max          | 46.98 | 0.84     | 52.60 | 1.64    | 1.99  | 4.94 | 0.28  | 0.69  | 0.04 | 0.11 | 0.13 | 0.04 | 99.49  |
|               | Min          | 40.93 | 0.73     | 47.26 | 1.48    | 0.02  | 0.06 | 0.03  | 0.02  | 0.02 | 0.02 | 0.03 | 0.02 | 97.11  |
|               | Median       | 45.47 | 0.81     | 51.39 | 1.61    | 0.21  | 0.89 | 0.26  | 0.05  | 0.04 | 0.06 | 0.08 | 0.03 | 98.13  |
|               | Mean         | 45.13 | 0.81     | 51.25 | 1.60    | 0.54  | 1.19 | 0.19  | 0.17  | 0.03 | 0.06 | 0.08 | 0.03 | 98.11  |
|               |              |       |          |       |         |       |      |       |       |      |      |      |      |        |
| Py2           | JL98-A7-1    | 47.80 | 0.85     | 53.04 | 1.66    | 0.07  | <dl  | <dl   | <dl   | <dl  | 0.02 | <dl  | 0.03 | 101.01 |

|               |              |       |      |       |      |      |      |     |       |      |      |      |       |        |
|---------------|--------------|-------|------|-------|------|------|------|-----|-------|------|------|------|-------|--------|
| (n=14)        | JL98-A7-2    | 46.59 | 0.83 | 53.35 | 1.67 | <dl  | <dl  | <dl | 0.04  | <dl  | 0.03 | <dl  | <dl   | 100.06 |
|               | JL98-A7-3    | 46.14 | 0.82 | 52.55 | 1.64 | <dl  | 0.07 | <dl | 0.05  | <dl  | 0.02 | <dl  | <dl   | 98.95  |
|               | JL98-A7-4    | 46.72 | 0.83 | 53.49 | 1.67 | <dl  | <dl  | <dl | <dl   | <dl  | 0.02 | <dl  | 0.02  | 100.35 |
|               | JL98-A7-5    | 45.99 | 0.82 | 53.47 | 1.67 | <dl  | <dl  | <dl | <dl   | <dl  | <dl  | <dl  | <dl   | 99.53  |
|               | JL98-A7-6    | 46.18 | 0.82 | 51.77 | 1.62 | <dl  | 0.08 | <dl | <dl   | <dl  | 0.05 | 0.06 | <dl   | 100.57 |
|               | JL98-A7-7    | 45.95 | 0.82 | 52.01 | 1.63 | <dl  | 0.04 | <dl | <dl   | <dl  | <dl  | 0.14 | <dl   | 100.59 |
|               | JL98-A7-8    | 46.20 | 0.83 | 52.22 | 1.63 | <dl  | <dl  | <dl | <dl   | <dl  | 0.06 | 0.08 | <dl   | 101.02 |
|               | JL98-A7-9    | 46.16 | 0.82 | 51.83 | 1.62 | <dl  | 0.05 | <dl | <dl   | <dl  | <dl  | <dl  | <dl   | 100.48 |
|               | JL98-A7-10   | 46.33 | 0.83 | 52.38 | 1.64 | <dl  | <dl  | <dl | <dl   | <dl  | 0.06 | <dl  | <dl   | 101.24 |
|               | JL98-A7-11   | 46.10 | 0.82 | 52.09 | 1.63 | <dl  | <dl  | <dl | <dl   | <dl  | <dl  | <dl  | <dl   | 100.64 |
|               | JL98-A7-12   | 45.55 | 0.81 | 51.93 | 1.62 | <dl  | <dl  | <dl | <dl   | <dl  | 0.06 | <dl  | <dl   | 99.98  |
|               | JL98-A7-13   | 45.57 | 0.81 | 52.17 | 1.63 | <dl  | <dl  | <dl | <dl   | <dl  | 0.04 | <dl  | <dl   | 100.23 |
|               | JL98-A7-14   | 46.11 | 0.82 | 52.13 | 1.63 | <dl  | <dl  | <dl | <dl   | <dl  | <dl  | <dl  | <dl   | 100.69 |
|               | Max          | 47.80 | 0.85 | 53.49 | 1.67 | 0.07 | 0.08 | <dl | 0.05  | <dl  | 0.06 | 0.14 | 0.03  | 101.01 |
| Py3<br>(n=20) | Min          | 45.55 | 0.81 | 51.77 | 1.62 | 0.07 | 0.04 | <dl | 0.04  | <dl  | 0.02 | 0.06 | 0.02  | 97.55  |
|               | Median       | 46.15 | 0.82 | 52.19 | 1.63 | 0.07 | 0.06 | <dl | 0.04  | <dl  | 0.04 | 0.08 | 0.02  | 98.40  |
|               | Mean         | 46.24 | 0.83 | 52.46 | 1.64 | 0.07 | 0.06 | <dl | 0.04  | <dl  | 0.04 | 0.09 | 0.02  | 98.81  |
|               | JL122-1-A2-1 | 45.14 | 0.81 | 51.71 | 1.62 | <dl  | 0.23 | <dl | <dl   | <dl  | 0.03 | <dl  | <dl   | 97.53  |
|               | JL122-1-A2-2 | 45.03 | 0.80 | 51.54 | 1.61 | 0.08 | 0.15 | <dl | 0.13  | <dl  | 0.02 | <dl  | <dl   | 97.38  |
|               | JL122-1-A2-3 | 43.67 | 0.78 | 51.47 | 1.61 | 0.16 | 0.03 | <dl | 1.37* | 0.03 | 0.09 | <dl  | 0.23* | 98.12  |
|               | JL122-1-A2-4 | 44.35 | 0.79 | 52.11 | 1.63 | 0.11 | 0.06 | <dl | 0.83* | 0.04 | 0.06 | <dl  | 0.06  | 98.54  |
|               | JL122-1-A2-5 | 46.91 | 0.84 | 50.59 | 1.58 | 0.02 | <dl  | <dl | <dl   | <dl  | <dl  | <dl  | 0.04  | 98.26  |
|               | JL122-1-A2-6 | 46.43 | 0.83 | 53.05 | 1.66 | <dl  | <dl  | <dl | <dl   | <dl  | 0.02 | <dl  | 0.09  | 100.05 |
|               | JL122-1-A2-7 | 46.10 | 0.82 | 53.11 | 1.66 | <dl  | <dl  | <dl | 0.12  | <dl  | 0.02 | <dl  | <dl   | 100.02 |
|               | JL122-1-A2-8 | 46.56 | 0.83 | 53.01 | 1.66 | 0.03 | <dl  | <dl | 0.07  | <dl  | 0.04 | <dl  | 0.06  | 100.23 |
|               | JL122-1-A2-9 | 46.42 | 0.83 | 53.23 | 1.66 | <dl  | <dl  | <dl | 0.04  | <dl  | <dl  | <dl  | 0.06  | 100.42 |

|               |               |       |      |       |      |      |      |      |       |      |      |      |      |        |
|---------------|---------------|-------|------|-------|------|------|------|------|-------|------|------|------|------|--------|
|               | JL122-1-A2-10 | 46.83 | 0.84 | 52.84 | 1.65 | <dl  | <dl  | <dl  | <dl   | 0.04 | 0.03 | 0.10 | <dl  | 102.33 |
|               | JL122-1-A2-11 | 46.30 | 0.83 | 52.51 | 1.64 | <dl  | <dl  | <dl  | <dl   | <dl  | <dl  | <dl  | 0.08 | 101.36 |
|               | JL122-1-A2-12 | 47.12 | 0.84 | 52.49 | 1.64 | <dl  | <dl  | <dl  | <dl   | <dl  | 0.05 | <dl  | 0.08 | 102.22 |
|               | JL122-1-A2-13 | 46.52 | 0.83 | 52.95 | 1.65 | <dl  | <dl  | 0.02 | <dl   | 0.02 | 0.04 | 0.09 | <dl  | 102.13 |
|               | JL122-1-A2-14 | 45.95 | 0.82 | 52.28 | 1.63 | <dl  | <dl  | <dl  | 0.03  | 0.04 | 0.05 | <dl  | <dl  | 100.81 |
|               | JL122-1-A2-15 | 46.40 | 0.83 | 53.00 | 1.66 | <dl  | <dl  | 0.03 | 0.02  | <dl  | 0.04 | <dl  | 0.03 | 102.00 |
|               | JL122-1-A2-16 | 45.99 | 0.82 | 52.13 | 1.63 | <dl  | <dl  | <dl  | <dl   | <dl  | 0.04 | <dl  | 0.02 | 100.62 |
|               | JL122-1-A2-17 | 46.47 | 0.83 | 52.64 | 1.64 | <dl  | <dl  | <dl  | <dl   | <dl  | 0.05 | <dl  | 0.03 | 101.66 |
|               | JL122-1-A2-18 | 46.69 | 0.83 | 52.65 | 1.65 | <dl  | <dl  | <dl  | 0.03  | <dl  | <dl  | <dl  | 0.04 | 101.90 |
|               | JL122-1-A2-19 | 46.03 | 0.82 | 52.36 | 1.64 | <dl  | <dl  | <dl  | <dl   | 0.03 | 0.07 | <dl  | 0.05 | 100.99 |
|               | JL122-1-A2-20 | 45.41 | 0.81 | 51.87 | 1.62 | <dl  | <dl  | <dl  | 0.08  | 0.11 | 0.05 | 0.09 | 0.04 | 100.07 |
|               | Max           | 47.12 | 0.84 | 53.23 | 1.66 | 0.16 | 0.23 | 0.03 | 1.37  | 0.11 | 0.09 | 0.10 | 0.23 | 100.42 |
|               | Min           | 43.67 | 0.78 | 50.59 | 1.58 | 0.02 | 0.03 | 0.02 | 0.02  | 0.02 | 0.02 | 0.09 | 0.02 | 97.38  |
|               | Median        | 46.35 | 0.83 | 52.50 | 1.64 | 0.08 | 0.10 | 0.02 | 0.08  | 0.04 | 0.04 | 0.09 | 0.05 | 99.04  |
|               | Mean          | 46.02 | 0.82 | 52.38 | 1.64 | 0.08 | 0.12 | 0.02 | 0.27  | 0.04 | 0.04 | 0.09 | 0.06 | 98.97  |
| Py4<br>(n=28) | JL104-A5-1    | 45.93 | 0.82 | 53.58 | 1.67 | <dl  | <dl  | <dl  | 0.07  | <dl  | <dl  | <dl  | <dl  | 100.68 |
|               | JL104-A5-2    | 45.03 | 0.80 | 52.11 | 1.63 | <dl  | 0.10 | <dl  | 0.07  | <dl  | 0.03 | <dl  | 0.07 | 98.76  |
|               | JL104-A5-3    | 46.18 | 0.82 | 52.74 | 1.65 | <dl  | 0.03 | <dl  | <dl   | <dl  | <dl  | <dl  | <dl  | 100.21 |
|               | JL104-A6-2-1  | 38.44 | 0.69 | 49.16 | 1.54 | 0.10 | 2.73 | <dl  | 0.51* | <dl  | 0.02 | <dl  | <dl  | 98.68  |
|               | JL104-A6-2-2  | 46.06 | 0.82 | 52.81 | 1.65 | 0.03 | <dl  | <dl  | 0.08  | <dl  | 0.03 | <dl  | <dl  | 99.18  |
|               | JL104-A6-2-4  | 46.15 | 0.82 | 53.44 | 1.67 | <dl  | <dl  | <dl  | 0.03  | <dl  | 0.02 | 0.04 | 0.07 | 99.87  |
|               | JL104-A6-3-4  | 46.52 | 0.83 | 52.82 | 1.65 | <dl  | 0.08 | <dl  | <dl   | <dl  | <dl  | 0.05 | 0.02 | 99.55  |
|               | JL104-A6-3-6  | 47.03 | 0.84 | 52.44 | 1.64 | <dl  | 0.04 | <dl  | <dl   | <dl  | <dl  | <dl  | <dl  | 99.55  |
|               | JL104-A6-3-7  | 46.59 | 0.83 | 52.57 | 1.64 | 0.13 | 0.12 | <dl  | 0.05  | <dl  | <dl  | <dl  | <dl  | 99.48  |
|               | JL104-A6-4-5  | 46.43 | 0.83 | 53.73 | 1.68 | 0.04 | <dl  | <dl  | <dl   | <dl  | 0.03 | <dl  | 0.02 | 100.31 |
|               | JL104-A6-4-6  | 46.55 | 0.83 | 53.28 | 1.67 | <dl  | <dl  | <dl  | <dl   | <dl  | <dl  | 0.03 | 0.06 | 100.05 |

|              |       |      |       |      |      |      |     |      |      |      |      |      |        |
|--------------|-------|------|-------|------|------|------|-----|------|------|------|------|------|--------|
| JL39-A3-1    | 46.15 | 0.82 | 52.77 | 1.65 | 0.25 | <dl  | <dl | <dl  | <dl  | 0.05 | 0.04 | 0.06 | 99.38  |
| JL39-A3-2    | 46.70 | 0.83 | 52.90 | 1.65 | 0.03 | <dl  | <dl | <dl  | <dl  | 0.04 | <dl  | 0.06 | 99.93  |
| JL39-A3-3    | 45.90 | 0.82 | 53.21 | 1.66 | 0.04 | <dl  | <dl | 0.03 | <dl  | 0.03 | <dl  | <dl  | 99.28  |
| JL39-A9-1    | 46.56 | 0.83 | 52.89 | 1.65 | <dl  | <dl  | <dl | <dl  | <dl  | 0.04 | <dl  | 0.03 | 99.59  |
| JL122-2-A5-1 | 46.70 | 0.83 | 53.18 | 1.66 | <dl  | 0.06 | <dl | <dl  | 0.02 | 0.05 | <dl  | <dl  | 100.08 |
| JL122-2-A5-2 | 46.36 | 0.83 | 52.32 | 1.63 | 0.11 | <dl  | <dl | 0.06 | <dl  | 0.07 | <dl  | 0.03 | 99.06  |
| JL122-2-A5-3 | 46.71 | 0.83 | 52.31 | 1.63 | 0.04 | <dl  | <dl | <dl  | <dl  | <dl  | <dl  | 0.05 | 99.30  |
| JL122-2-A5-4 | 46.38 | 0.83 | 52.54 | 1.64 | 0.11 | <dl  | <dl | <dl  | <dl  | <dl  | <dl  | 0.04 | 99.16  |
| JL122-2-A5-5 | 46.70 | 0.83 | 53.18 | 1.66 | 0.04 | 0.03 | <dl | 0.03 | <dl  | 0.03 | 0.06 | <dl  | 100.15 |
| JL5-A1-1     | 46.18 | 0.82 | 52.66 | 1.65 | <dl  | 0.04 | <dl | <dl  | <dl  | 0.18 | <dl  | 0.04 | 101.57 |
| JL5-A1-2     | 46.48 | 0.83 | 52.83 | 1.65 | <dl  | <dl  | <dl | 0.02 | <dl  | 0.07 | <dl  | 0.04 | 101.91 |
| JL5-A1-3     | 45.32 | 0.81 | 52.31 | 1.63 | <dl  | 0.39 | <dl | <dl  | 0.07 | 0.09 | 0.08 | <dl  | 100.70 |
| JL5-A3-1     | 46.61 | 0.83 | 52.96 | 1.65 | <dl  | 0.08 | <dl | <dl  | <dl  | 0.05 | <dl  | 0.04 | 102.23 |
| JL5-A3-2     | 46.81 | 0.84 | 52.70 | 1.65 | <dl  | <dl  | <dl | <dl  | <dl  | <dl  | 0.05 | <dl  | 102.04 |
| JL5-A3-3     | 46.73 | 0.83 | 52.62 | 1.64 | <dl  | 0.04 | <dl | <dl  | 0.02 | 0.06 | <dl  | <dl  | 101.95 |
| JL5-A4-1     | 46.85 | 0.84 | 52.87 | 1.65 | <dl  | <dl  | <dl | <dl  | <dl  | 0.08 | <dl  | 0.04 | 102.33 |
| JL5-A4-2     | 45.86 | 0.82 | 52.75 | 1.65 | <dl  | <dl  | <dl | <dl  | <dl  | 0.04 | <dl  | 0.04 | 101.16 |
| Max          | 47.03 | 0.84 | 53.73 | 1.68 | 0.25 | 2.73 | <dl | 0.51 | 0.07 | 0.18 | 0.08 | 0.07 | 100.68 |
| Min          | 38.44 | 0.69 | 49.16 | 1.54 | 0.03 | 0.03 | <dl | 0.02 | 0.02 | 0.02 | 0.03 | 0.02 | 98.26  |
| Median       | 46.45 | 0.83 | 52.79 | 1.65 | 0.04 | 0.07 | <dl | 0.05 | 0.02 | 0.04 | 0.05 | 0.04 | 99.51  |
| Mean         | 46.07 | 0.82 | 52.70 | 1.65 | 0.08 | 0.31 | <dl | 0.09 | 0.04 | 0.05 | 0.05 | 0.04 | 99.51  |

Note: <dl, below detection limit; \*, affected by mineral inclusions.

**Table S3.** LA-ICP-MS data for Jilongshan pyrite (ppm)

[illegible]

|               |              |     |     |         |        |     |      |     |      |     |      |     |      |      |      |      |
|---------------|--------------|-----|-----|---------|--------|-----|------|-----|------|-----|------|-----|------|------|------|------|
|               | JL98-A7-2    | 9.3 | 5.5 | 26      | <dl    | 5.2 | 820  | 77  | 0.51 | <dl | 2.2  | 37  | 0.09 | 0.03 | 54   | 3.2  |
|               | JL98-A7-3    | 6.7 | 3.8 | 19      | <dl    | 3.7 | 526  | 66  | <dl  | <dl | <dl  | 23  | <dl  | 0.02 | 35   | 3.0  |
|               | JL98-A7-4    | 32  | <dl | 4.7     | <dl    | 5.8 | 561  | 73  | <dl  | <dl | 0.59 | 27  | <dl  | <dl  | 11   | 1.7  |
|               | JL98-A7-5    | 22  | <dl | <dl     | <dl    | 7.0 | 89   | 71  | 0.20 | <dl | <dl  | 30  | <dl  | <dl  | 36   | 3.4  |
|               | JL98-A7-6    | <dl | <dl | <dl     | <dl    | 4.0 | 62   | 79  | <dl  | <dl | <dl  | <dl | <dl  | <dl  | <dl  | <dl  |
|               | JL98-A7-7    | 19  | <dl | <dl     | <dl    | 4.1 | 82   | 79  | 0.06 | <dl | <dl  | 2.0 | <dl  | <dl  | 3.5  | 1.3  |
|               | JL98-A7-8    | 15  | <dl | <dl     | <dl    | 5.3 | 186  | 63  | <dl  | <dl | <dl  | 1.8 | <dl  | 0.01 | 1.6  | 0.65 |
|               | JL76-A2-11   | 357 | <dl | <dl     | <dl    | 5.1 | 579  | 450 | <dl  | <dl | <dl  | 52  | <dl  | <dl  | 0.10 | 0.01 |
|               | JL76-A2-12   | 278 | <dl | 7.0     | <dl    | 5.4 | 597  | 457 | 0.68 | <dl | 0.85 | 46  | <dl  | 0.05 | 0.09 | 6.5  |
|               | JL76-A2-13   | 135 | <dl | <dl     | <dl    | 5.5 | 432  | 924 | <dl  | <dl | <dl  | 30  | <dl  | <dl  | 0.05 | <dl  |
|               | JLS-24-A1-1  | 168 | 23  | 5.7     | 11     | <dl | 32   | 62  | <dl  | <dl | <dl  | 16  | <dl  | \    | 7.4  | <dl  |
|               | JLS-24-A1-2  | 304 | 22  | 3.2     | <dl    | <dl | 30   | 60  | <dl  | <dl | <dl  | <dl | <dl  | \    | 0.49 | <dl  |
|               | JLS-24-A1-3  | 45  | 27  | 5.9     | <dl    | <dl | 30   | 391 | <dl  | <dl | <dl  | 10  | <dl  | \    | <dl  | <dl  |
|               | JLS-24-A1-4  | 25  | 3.0 | 3.5     | <dl    | <dl | 26   | 338 | <dl  | <dl | <dl  | <dl | <dl  | \    | <dl  | <dl  |
|               | JLS-18-A3-1  | 26  | <dl | 14      | 209    | <dl | 1667 | <dl | 3.6  | <dl | 2.5  | 183 | <dl  | \    | 66   | 56   |
|               | JLS-18-A3-2  | 30  | <dl | 32      | 269    | <dl | 1333 | <dl | <dl  | <dl | 3.7  | 208 | <dl  | \    | 89   | 98   |
|               | JLS-18-A3-3  | 719 | 5.5 | <dl     | <dl    | 2.7 | 995  | 8.1 | <dl  | <dl | <dl  | 23  | <dl  | \    | 1.3  | <dl  |
|               | JLS-18-A3-4  | 712 | 3.6 | <dl     | <dl    | 1.7 | 1347 | 12  | <dl  | <dl | <dl  | 15  | <dl  | \    | <dl  | <dl  |
| Py3<br>(n=15) | JL122-1-A2-1 | 34  | 13  | 317990* | 11508* | 5.0 | 26   | 399 | 372  | 215 | 11   | 7.4 | <dl  | 0.23 | 1.6  | 62   |
|               | JL122-1-A2-2 | 84  | 81  | 233139* | 17565* | 6.1 | 41   | 345 | 181  | 306 | 30   | 9.1 | <dl  | 0.22 | 1.6  | 76   |
|               | JL122-1-A2-3 | 51  | 44  | 216303* | 3418*  | 5.1 | 26   | 344 | 356  | 63  | 12   | 8.9 | 0.20 | 0.26 | 1.1  | 83   |
|               | JL122-1-A2-4 | 80  | 66  | 249953* | 12598* | 5.4 | 96   | 314 | 745  | 224 | 40   | 9.2 | 0.30 | 0.37 | 2.8  | 179  |
|               | JL109-A1-1   | 83  | 274 | 3805*   | 5049*  | 5.1 | <dl  | 541 | 88   | 59  | 0.76 | 5.1 | 0.58 | <dl  | 1.1  | 36   |
|               | JL109-A1-2   | 143 | 81  | 6800*   | 2327*  | 5.7 | 767  | 371 | 161  | 40  | 104  | 4.4 | 0.80 | 34   | 5.8  | 45   |
|               | JL109-A3-1   | 434 | 212 | 13738*  | 4799*  | 4.9 | -    | 613 | 402  | 51  | 114  | <dl | 0.67 | 23   | 21   | 164  |
|               | JL109-A3-2   | 194 | 110 | 4353*   | 2625*  | 5.6 | 567  | 403 | 229  | 34  | 57   | 3.3 | 0.52 | 28   | 5.1  | 44   |

|               |              |     |       |         |        |     |      |      |      |     |      |      |      |      |      |       |
|---------------|--------------|-----|-------|---------|--------|-----|------|------|------|-----|------|------|------|------|------|-------|
| Py4<br>(n=21) | JL109-A3-3   | 96  | 111   | 4081*   | 2728*  | 5.3 | 159  | 390  | 239  | 37  | 40   | 4.5  | 0.40 | 30   | 1.0  | 15    |
|               | JL83-A1-1    | 652 | 39    | 95655*  | 1686*  | 5.2 | 517  | 266  | 198  | 26  | 93   | 7.4  | 0.11 | 0.62 | 2.4  | 33    |
|               | JL83-A1-2    | 432 | 30    | 89220*  | 1883*  | 5.3 | 865  | 219  | 245  | 29  | 122  | 4.6  | <dl  | 1.2  | 0.53 | 52    |
|               | JL83-A1-3    | 284 | 30    | 310683* | 2619*  | 5.8 | 372  | 278  | 116  | 29  | 21   | 3.8  | <dl  | 0.79 | 1.0  | 18    |
|               | JL83-A1-4    | 399 | 28    | 1825*   | 1650*  | 5.7 | 311  | 274  | 264  | 26  | 72   | 4.7  | <dl  | 1.5  | 3.8  | 115   |
|               | JL83-A2-1    | 353 | 28    | 546735* | 6418*  | <dl | 34   | 201  | 942  | 81  | 41   | <dl  | <dl  | 0.81 | 12   | 99    |
|               | JL83-A2-2    | 404 | 91    | 499127* | 1167*  | <dl | 77   | 212  | 944  | 17  | 57   | <dl  | 0.55 | 0.76 | 9.1  | 109   |
|               | JL5-A1-1     | 96  | 9.3   | 5437*   | 259    | 5.3 | 2336 | 246  | 12   | 5.0 | 468  | 16   | 1.5  | 17   | 3.2  | 377   |
|               | JL5-A1-2     | <dl | 7.7   | 31      | 4.8    | 4.9 | 3004 | 107  | 5.9  | 2.1 | 31   | 6.1  | 0.12 | 0.65 | 4.6  | 83    |
|               | JL5-A1-3     | 216 | 15    | 723     | 90     | 5.3 | 579  | 388  | 6.3  | 1.3 | 368  | 6.4  | 0.64 | 4.5  | 1.1  | 188   |
|               | JL39-A9-1    | <dl | 1.3   | 139     | 11289* | 4.9 | 161  | <dl  | 3.6  | 70  | 4.6  | 7.1  | 0.08 | 0.02 | <dl  | 299   |
|               | JL39-A9-2    | <dl | 1.9   | 36      | <dl    | 4.7 | 258  | 0.20 | 66   | 1.3 | 36   | 9.1  | 145  | 0.08 | <dl  | 9429* |
|               | JL39-A9-3    | <dl | 1.9   | <dl     | <dl    | 4.7 | 109  | <dl  | 0.10 | <dl | <dl  | 4.4  | <dl  | <dl  | <dl  | 2.4   |
|               | JL39-A9-4    | <dl | <dl   | 1.9     | <dl    | 4.3 | 447  | <dl  | <dl  | <dl | 0.69 | 3.2  | <dl  | 0.01 | <dl  | 12    |
|               | JL122-2-A5-1 | 5.7 | <dl   | 35639*  | 26     | 4.8 | 243  | 47   | 550* | <dl | 3.3  | 390* | 21*  | 0.13 | 21   | 8.6   |
|               | JL122-2-A5-2 | <dl | <dl   | 667     | 17     | 4.6 | 491  | 87   | 117  | <dl | 1.4  | 111  | 4.6  | <dl  | 14   | 8.3   |
|               | JL104-A5-1   | 965 | 3199* | 1625*   | 1410*  | 6.1 | 1988 | 321  | 4.8  | 15  | 1.1  | 54   | 0.77 | 0.02 | 56   | 161   |
|               | JL104-A5-2   | 39  | 164   | 3525*   | 1567*  | 6.3 | 3031 | 120  | 115  | 25  | 56   | 86   | 3.3  | 0.31 | 0.99 | 116   |
|               | JL104-A5-3   | 27  | 26    | 82      | 119    | 6.6 | 1008 | <dl  | 19   | 4.0 | 29   | 31   | 4.8  | 15   | 0.14 | 233   |
|               | JL104-A6-2-1 | 3.2 | 26    | 830     | 27     | 9.7 | 1419 | <dl  | 120  | <dl | 144  | 118  | 7.6  | 107  | 1.3  | 4022* |
|               | JL104-A6-2-2 | 4.9 | 6.6   | 338     | 34     | 4.9 | 608  | <dl  | 102  | 2.9 | 365  | 124  | 2.9  | 230  | 0.24 | 6472* |
|               | JL104-A6-2-3 | 3.8 | <dl   | 468     | 4.8    | 6.9 | 804  | <dl  | 91   | <dl | 177  | 90   | 3.7  | 60   | 0.14 | 2291* |
|               | JL104-A6-2-4 | 5.6 | <dl   | 514     | 29     | 7.7 | 639  | <dl  | 89   | 1.7 | 128  | 110  | 3.2  | 52   | 0.38 | 7058* |
|               | JL104-A6-3-1 | <dl | <dl   | 37      | <dl    | 5.7 | 2729 | <dl  | 2.3  | <dl | 0.68 | 333  | 0.52 | 0.06 | <dl  | 16    |
|               | JL104-A6-3-2 | 1.7 | 1.5   | 99      | <dl    | 5.9 | 2091 | <dl  | 21   | <dl | 32   | 325  | 23   | 22   | 0.08 | 299   |
|               | JL104-A6-3-3 | 22  | 11    | 576     | 101    | 6.6 | 1987 | <dl  | 61   | 2.4 | 140  | 265  | 1.5  | 27   | 0.07 | 618   |



|              |     |     |    |     |     |      |     |     |     |     |     |      |      |     |     |
|--------------|-----|-----|----|-----|-----|------|-----|-----|-----|-----|-----|------|------|-----|-----|
| JL104-A6-3-4 | <dl | <dl | 20 | <dl | 5.7 | 1142 | <dl | 7.4 | <dl | 1.6 | 494 | 0.88 | 0.02 | <dl | 29  |
| JL104-A6-3-5 | <dl | <dl | 32 | <dl | 6.7 | 2055 | <dl | 16  | <dl | 6.4 | 355 | 1.3  | 2.0  | <dl | 150 |

---

Note: <dl, below detection limit; \*, affected by mineral inclusions; \, undetected. Data affected by the mineral inclusions are not involved in the plots (e.g., Figures 8, 9, 11, 12, 14). Because Py1 is framboidal pyrite and the grains are very fine, it is difficult to exclude all data which are affected by inclusions, so we show all data of Py1\*.
